# Supplementary material
Source: MDPI journal article supplement (https://www.mdpi.com/2075-1680/12/7/690)
Supplement: s1 [file s1]

## Supplementary Materials

### Analysis of WE Parameters of Life Using Adaptive-Progressively Type-II Hybrid Censored Mechanical Equipment Data

Ahmed Elshahhat<sup>1,\*</sup>, Ehab M. Almetwally<sup>2</sup>, Sanku Dey<sup>3</sup> and Heba S. Mohammed<sup>4</sup>

<sup>1</sup>Faculty of Technology and Development, Zagazig University, Zagazig 44519, Egypt

<sup>2</sup>Faculty of Business Administration, Delta University for Science and Technology, Gamasa, 11152, Egypt

<sup>3</sup>Department of Statistics, St. Anthony's College, Shillong, Meghalaya, India

<sup>4</sup>Department of Mathematical Sciences, College of Science, Princess Nourah bint Abdulrahman University,  
P.O. Box 84428, Riyadh 11671, Saudi Arabia

Table S1: The MSs (1<sup>st</sup> column) and MSEs (2<sup>nd</sup> column) of  $\gamma$ .

| $T$ | $(n, m)$ | Scheme | MLE    |        | PSE    |        | BE-ML  |        | BE-PS  |        |
|-----|----------|--------|--------|--------|--------|--------|--------|--------|--------|--------|
| 2   | (50,20)  | 1      | 0.0238 | 0.0075 | 0.0230 | 0.0071 | 0.0223 | 0.0050 | 0.0183 | 0.0045 |
|     |          | 2      | 0.0245 | 0.0088 | 0.0224 | 0.0059 | 0.0216 | 0.0047 | 0.0179 | 0.0042 |
|     |          | 3      | 0.0246 | 0.0072 | 0.0221 | 0.0061 | 0.0212 | 0.0045 | 0.0173 | 0.0041 |
|     | (50,40)  | 1      | 0.0223 | 0.0068 | 0.0221 | 0.0056 | 0.0202 | 0.0045 | 0.0170 | 0.0041 |
|     |          | 2      | 0.0222 | 0.0067 | 0.0198 | 0.0048 | 0.0178 | 0.0042 | 0.0172 | 0.0037 |
|     |          | 3      | 0.0219 | 0.0065 | 0.0194 | 0.0045 | 0.0171 | 0.0039 | 0.0157 | 0.0035 |
|     | (80,32)  | 1      | 0.0215 | 0.0055 | 0.0142 | 0.0042 | 0.0128 | 0.0025 | 0.0124 | 0.0022 |
|     |          | 2      | 0.0212 | 0.0061 | 0.0145 | 0.0034 | 0.0131 | 0.0022 | 0.0122 | 0.0023 |
|     |          | 3      | 0.0209 | 0.0051 | 0.0155 | 0.0039 | 0.0127 | 0.0023 | 0.0116 | 0.0021 |
|     | (80,64)  | 1      | 0.0202 | 0.0048 | 0.0129 | 0.0034 | 0.0119 | 0.0021 | 0.0112 | 0.0019 |
|     |          | 2      | 0.0194 | 0.0048 | 0.0139 | 0.0035 | 0.0120 | 0.0019 | 0.0119 | 0.0017 |
|     |          | 3      | 0.0192 | 0.0045 | 0.0141 | 0.0035 | 0.0115 | 0.0020 | 0.0111 | 0.0018 |
| 3   | (50,20)  | 1      | 0.0235 | 0.0074 | 0.0198 | 0.0065 | 0.0134 | 0.0052 | 0.0092 | 0.0039 |
|     |          | 2      | 0.0221 | 0.0086 | 0.0178 | 0.0059 | 0.0128 | 0.0041 | 0.0084 | 0.0032 |
|     |          | 3      | 0.0228 | 0.0065 | 0.0165 | 0.0053 | 0.0121 | 0.0038 | 0.0090 | 0.0030 |
|     | (50,40)  | 1      | 0.0218 | 0.0068 | 0.0175 | 0.0052 | 0.0115 | 0.0037 | 0.0085 | 0.0028 |
|     |          | 2      | 0.0201 | 0.0064 | 0.0164 | 0.0047 | 0.0108 | 0.0035 | 0.0081 | 0.0030 |
|     |          | 3      | 0.0191 | 0.0061 | 0.0156 | 0.0041 | 0.0102 | 0.0034 | 0.0086 | 0.0028 |
|     | (80,32)  | 1      | 0.0205 | 0.0059 | 0.0168 | 0.0047 | 0.0102 | 0.0035 | 0.0078 | 0.0028 |
|     |          | 2      | 0.0193 | 0.0056 | 0.0152 | 0.0041 | 0.0099 | 0.0032 | 0.0069 | 0.0026 |
|     |          | 3      | 0.0183 | 0.0054 | 0.0145 | 0.0037 | 0.0089 | 0.0029 | 0.0068 | 0.0024 |
|     | (80,64)  | 1      | 0.0194 | 0.0048 | 0.0152 | 0.0038 | 0.0092 | 0.0024 | 0.0058 | 0.0023 |
|     |          | 2      | 0.0182 | 0.0045 | 0.0143 | 0.0032 | 0.0084 | 0.0023 | 0.0050 | 0.0019 |
|     |          | 3      | 0.0174 | 0.0047 | 0.0138 | 0.0033 | 0.0081 | 0.0019 | 0.0046 | 0.0017 |

---

\*Email: aelshahhat@dttd.zu.edu.eg

Table S2: The MSs ( $1^{st}$  column) and MSEs ( $2^{nd}$  column) of  $\sigma$ .

| $T$ | $(n, m)$ | Scheme | MLE     |        | PSE     |        | BE-ML   |        | BE-PS   |        |
|-----|----------|--------|---------|--------|---------|--------|---------|--------|---------|--------|
| 2   | (50,20)  | 1      | -0.1074 | 0.6506 | -0.1391 | 1.0886 | -0.0566 | 0.2324 | -0.0678 | 0.2533 |
|     |          | 2      | -0.1237 | 0.7426 | -0.3025 | 1.8802 | -0.0637 | 0.2554 | -0.0670 | 0.2482 |
|     |          | 3      | -0.1318 | 1.1300 | -0.1561 | 1.0844 | -0.0733 | 0.2624 | -0.0772 | 0.2666 |
|     | (50,40)  | 1      | -0.0945 | 0.6189 | -0.1258 | 0.7698 | -0.0507 | 0.2147 | -0.0596 | 0.2493 |
|     |          | 2      | -0.1086 | 0.6837 | -0.2770 | 0.9260 | -0.0511 | 0.2358 | -0.0538 | 0.2426 |
|     |          | 3      | -0.1274 | 0.6755 | -0.1553 | 0.9864 | -0.0549 | 0.2398 | -0.0578 | 0.2524 |
|     | (80,32)  | 1      | -0.0904 | 0.5294 | -0.1019 | 0.4854 | -0.0352 | 0.2268 | -0.0371 | 0.2289 |
|     |          | 2      | -0.0812 | 0.6798 | -0.2595 | 0.8386 | -0.0422 | 0.2208 | -0.0444 | 0.2387 |
|     |          | 3      | -0.0985 | 0.6446 | -0.1349 | 0.9639 | -0.0485 | 0.2140 | -0.0534 | 0.2483 |
|     | (80,64)  | 1      | -0.0805 | 0.4088 | -0.0855 | 0.4085 | -0.0304 | 0.1997 | -0.0320 | 0.2161 |
|     |          | 2      | -0.0183 | 0.5205 | -0.2533 | 0.7097 | -0.0383 | 0.2072 | -0.0403 | 0.2102 |
|     |          | 3      | -0.0494 | 0.5812 | -0.1336 | 0.6038 | -0.0422 | 0.2175 | -0.0444 | 0.2181 |
| 3   | (50,20)  | 1      | -0.0801 | 0.6048 | -0.1194 | 0.8635 | -0.0159 | 0.0280 | -0.0162 | 0.0326 |
|     |          | 2      | -0.0965 | 0.6472 | -0.1884 | 1.0275 | -0.0190 | 0.0297 | -0.0195 | 0.0329 |
|     |          | 3      | -0.1360 | 1.1181 | -0.2196 | 1.2190 | -0.0222 | 0.0301 | -0.0236 | 0.0334 |
|     | (50,40)  | 1      | -0.0911 | 0.5344 | -0.1139 | 0.5810 | -0.0142 | 0.0276 | -0.0144 | 0.0319 |
|     |          | 2      | -0.0720 | 0.6289 | -0.1459 | 0.8267 | -0.0160 | 0.0288 | -0.0171 | 0.0323 |
|     |          | 3      | -0.0994 | 0.6329 | -0.1789 | 0.9034 | -0.0211 | 0.0292 | -0.0225 | 0.0329 |
|     | (80,32)  | 1      | -0.0702 | 0.3131 | -0.1010 | 0.4942 | -0.0130 | 0.0270 | -0.0132 | 0.0310 |
|     |          | 2      | -0.0747 | 0.5316 | -0.1376 | 0.7218 | -0.0167 | 0.0282 | -0.0163 | 0.0315 |
|     |          | 3      | -0.0790 | 0.5938 | -0.1717 | 0.7731 | -0.0178 | 0.0284 | -0.0182 | 0.0320 |
|     | (80,64)  | 1      | -0.0470 | 0.3071 | -0.0866 | 0.3940 | -0.0125 | 0.0261 | -0.0126 | 0.0304 |
|     |          | 2      | -0.0489 | 0.4332 | -0.1034 | 0.5727 | -0.0128 | 0.0274 | -0.0132 | 0.0308 |
|     |          | 3      | -0.0651 | 0.4589 | -0.1429 | 0.6840 | -0.0146 | 0.0286 | -0.0151 | 0.0315 |

Table S3: The MSs ( $1^{st}$  column) and MSEs ( $2^{nd}$  column) of  $R(t)$ .

| $T$ | $(n, m)$ | Scheme | MLE     |        | PSE     |        | BE-ML   |        | BE-PS   |        |
|-----|----------|--------|---------|--------|---------|--------|---------|--------|---------|--------|
| 2   | (50,20)  | 1      | -0.0154 | 0.0456 | -0.0136 | 0.0388 | -0.0075 | 0.0337 | -0.0071 | 0.0287 |
|     |          | 2      | -0.0137 | 0.0434 | -0.0127 | 0.0372 | -0.0064 | 0.0325 | -0.0058 | 0.0278 |
|     |          | 3      | -0.0124 | 0.0418 | -0.0115 | 0.0358 | -0.0061 | 0.0309 | -0.0054 | 0.0267 |
|     | (50,40)  | 1      | -0.0131 | 0.0389 | -0.0128 | 0.0331 | -0.0062 | 0.0288 | -0.0057 | 0.0249 |
|     |          | 2      | -0.0127 | 0.0376 | -0.0121 | 0.0315 | -0.0054 | 0.0276 | -0.0045 | 0.0236 |
|     |          | 3      | -0.0111 | 0.0354 | -0.0107 | 0.0301 | -0.0049 | 0.0264 | -0.0041 | 0.0228 |
|     | (80,32)  | 1      | -0.0117 | 0.0341 | -0.0111 | 0.0298 | -0.0033 | 0.0258 | -0.0031 | 0.0225 |
|     |          | 2      | -0.0102 | 0.0327 | -0.0099 | 0.0279 | -0.0031 | 0.0240 | -0.0027 | 0.0216 |
|     |          | 3      | -0.0096 | 0.0299 | -0.0087 | 0.0268 | -0.0027 | 0.0226 | -0.0023 | 0.0202 |
|     | (80,64)  | 1      | -0.0105 | 0.0325 | -0.0088 | 0.0286 | -0.0023 | 0.0243 | -0.0026 | 0.0219 |
|     |          | 2      | -0.0092 | 0.0316 | -0.0084 | 0.0269 | -0.0027 | 0.0234 | -0.0023 | 0.0195 |
|     |          | 3      | -0.0087 | 0.0287 | -0.0073 | 0.0254 | -0.0025 | 0.0212 | -0.0021 | 0.0188 |
| 3   | (50,20)  | 1      | -0.0258 | 0.0723 | 0.0234  | 0.0705 | -0.0203 | 0.0556 | 0.0180  | 0.0523 |
|     |          | 2      | -0.0195 | 0.0708 | 0.0185  | 0.0684 | -0.0149 | 0.0534 | 0.0141  | 0.0507 |
|     |          | 3      | -0.0176 | 0.0675 | 0.0168  | 0.0649 | -0.0132 | 0.0512 | 0.0126  | 0.0487 |
|     | (50,40)  | 1      | -0.0193 | 0.0694 | 0.0177  | 0.0671 | -0.0142 | 0.0528 | 0.0134  | 0.0501 |
|     |          | 2      | -0.0174 | 0.0665 | 0.0169  | 0.0645 | -0.0136 | 0.0494 | 0.0123  | 0.0482 |
|     |          | 3      | -0.0162 | 0.0637 | 0.0156  | 0.0612 | -0.0125 | 0.0471 | 0.0107  | 0.0456 |
|     | (80,32)  | 1      | -0.0176 | 0.0468 | 0.0154  | 0.0414 | -0.0132 | 0.0361 | 0.0118  | 0.0315 |
|     |          | 2      | -0.0158 | 0.0375 | 0.0136  | 0.0336 | -0.0123 | 0.0287 | 0.0105  | 0.0262 |
|     |          | 3      | -0.0149 | 0.0344 | 0.0121  | 0.0317 | -0.0118 | 0.0265 | 0.0098  | 0.0240 |
|     | (80,64)  | 1      | -0.0168 | 0.0369 | 0.0146  | 0.0348 | -0.0126 | 0.0274 | 0.0110  | 0.0264 |
|     |          | 2      | -0.0151 | 0.0334 | 0.0125  | 0.0321 | -0.0117 | 0.0245 | 0.0092  | 0.0245 |
|     |          | 3      | -0.0142 | 0.0315 | 0.0113  | 0.0295 | -0.0103 | 0.0233 | 0.0089  | 0.0223 |

Table S4: The MSs ( $1^{st}$  column) and MSEs ( $2^{nd}$  column) of  $h(t)$ .

| $T$ | $(n, m)$ | Scheme | MLE    |        | PSE    |        | BE-ML  |        | BE-PS  |        |
|-----|----------|--------|--------|--------|--------|--------|--------|--------|--------|--------|
| 2   | (50,20)  | 1      | 0.0158 | 0.0499 | 0.0164 | 0.0542 | 0.0119 | 0.0210 | 0.0128 | 0.0236 |
|     |          | 2      | 0.0176 | 0.0531 | 0.0181 | 0.0575 | 0.0132 | 0.0235 | 0.0164 | 0.0259 |
|     |          | 3      | 0.0191 | 0.0562 | 0.0198 | 0.0618 | 0.0143 | 0.0285 | 0.0187 | 0.0318 |
|     | (50,40)  | 1      | 0.0143 | 0.0416 | 0.0151 | 0.0459 | 0.0101 | 0.0185 | 0.0116 | 0.0215 |
|     |          | 2      | 0.0155 | 0.0492 | 0.0173 | 0.0540 | 0.0113 | 0.0207 | 0.0137 | 0.0228 |
|     |          | 3      | 0.0169 | 0.0543 | 0.0182 | 0.0593 | 0.0128 | 0.0225 | 0.0145 | 0.0254 |
|     | (80,32)  | 1      | 0.0126 | 0.0374 | 0.0148 | 0.0415 | 0.0094 | 0.0174 | 0.0108 | 0.0194 |
|     |          | 2      | 0.0133 | 0.0426 | 0.0156 | 0.0461 | 0.0099 | 0.0198 | 0.0117 | 0.0215 |
|     |          | 3      | 0.0146 | 0.0463 | 0.0163 | 0.0512 | 0.0108 | 0.0211 | 0.0123 | 0.0222 |
|     | (80,64)  | 1      | 0.0108 | 0.0323 | 0.0129 | 0.0359 | 0.0087 | 0.0165 | 0.0099 | 0.0182 |
|     |          | 2      | 0.0121 | 0.0386 | 0.0131 | 0.0422 | 0.0089 | 0.0177 | 0.0108 | 0.0198 |
|     |          | 3      | 0.0137 | 0.0417 | 0.0148 | 0.0445 | 0.0098 | 0.0185 | 0.0114 | 0.0209 |
| 3   | (50,20)  | 1      | 0.0132 | 0.0449 | 0.0152 | 0.0491 | 0.0111 | 0.0179 | 0.0118 | 0.0205 |
|     |          | 2      | 0.0141 | 0.0471 | 0.0176 | 0.0528 | 0.0121 | 0.0198 | 0.0136 | 0.0224 |
|     |          | 3      | 0.0165 | 0.0526 | 0.0193 | 0.0567 | 0.0134 | 0.0245 | 0.0152 | 0.0271 |
|     | (50,40)  | 1      | 0.0127 | 0.0384 | 0.0145 | 0.0421 | 0.0098 | 0.0161 | 0.0111 | 0.0192 |
|     |          | 2      | 0.0134 | 0.0433 | 0.0167 | 0.0486 | 0.0109 | 0.0173 | 0.0130 | 0.0205 |
|     |          | 3      | 0.0148 | 0.0499 | 0.0174 | 0.0536 | 0.0116 | 0.0189 | 0.0137 | 0.0227 |
|     | (80,32)  | 1      | 0.0118 | 0.0337 | 0.0141 | 0.0388 | 0.0091 | 0.0152 | 0.0105 | 0.0175 |
|     |          | 2      | 0.0128 | 0.0373 | 0.0147 | 0.0415 | 0.0095 | 0.0162 | 0.0113 | 0.0186 |
|     |          | 3      | 0.0131 | 0.0407 | 0.0152 | 0.0456 | 0.0103 | 0.0175 | 0.0118 | 0.0203 |
|     | (80,64)  | 1      | 0.0102 | 0.0312 | 0.0117 | 0.0329 | 0.0082 | 0.0136 | 0.0093 | 0.0158 |
|     |          | 2      | 0.0114 | 0.0357 | 0.0124 | 0.0394 | 0.0086 | 0.0145 | 0.0098 | 0.0171 |
|     |          | 3      | 0.012  | 0.0365 | 0.0136 | 0.0409 | 0.0094 | 0.0158 | 0.0107 | 0.0184 |

Table S5: The ACLs of 95% ACI/HPD intervals of  $\gamma$ .

| $T$ | $(n, m)$ | Scheme | ACI-ML | ACI-PS | HPD-ML | HPD-PS |
|-----|----------|--------|--------|--------|--------|--------|
| 2   | (50,20)  | 1      | 0.3556 | 0.3325 | 0.2528 | 0.2275 |
|     |          | 2      | 0.3273 | 0.3046 | 0.2483 | 0.2235 |
|     |          | 3      | 0.3092 | 0.2985 | 0.2445 | 0.2201 |
|     | (50,40)  | 1      | 0.3154 | 0.2966 | 0.2419 | 0.2177 |
|     |          | 2      | 0.3143 | 0.2956 | 0.2381 | 0.2143 |
|     |          | 3      | 0.3033 | 0.2851 | 0.2345 | 0.2111 |
|     | (80,32)  | 1      | 0.2700 | 0.2664 | 0.1789 | 0.1610 |
|     |          | 2      | 0.2687 | 0.2608 | 0.1785 | 0.1607 |
|     |          | 3      | 0.2667 | 0.2561 | 0.1674 | 0.1507 |
|     | (80,64)  | 1      | 0.2607 | 0.2529 | 0.1594 | 0.1435 |
|     |          | 2      | 0.2512 | 0.2509 | 0.1574 | 0.1417 |
|     |          | 3      | 0.2460 | 0.2380 | 0.1531 | 0.1378 |
| 3   | (50,20)  | 1      | 0.3544 | 0.3314 | 0.2372 | 0.2135 |
|     |          | 2      | 0.3085 | 0.2863 | 0.2333 | 0.2100 |
|     |          | 3      | 0.3032 | 0.2830 | 0.2257 | 0.2031 |
|     | (50,40)  | 1      | 0.3014 | 0.2974 | 0.2281 | 0.2053 |
|     |          | 2      | 0.2952 | 0.2840 | 0.2224 | 0.2002 |
|     |          | 3      | 0.2935 | 0.2819 | 0.2176 | 0.1958 |
|     | (80,32)  | 1      | 0.2659 | 0.2564 | 0.1588 | 0.1536 |
|     |          | 2      | 0.2625 | 0.2539 | 0.1529 | 0.1476 |
|     |          | 3      | 0.2527 | 0.2460 | 0.1707 | 0.1397 |
|     | (80,64)  | 1      | 0.2558 | 0.2508 | 0.1552 | 0.1429 |
|     |          | 2      | 0.2493 | 0.2399 | 0.1473 | 0.1326 |
|     |          | 3      | 0.2337 | 0.2355 | 0.1443 | 0.1299 |

Table S6: The ACLs of 95% ACI/HPD intervals of  $\sigma$ .

| $T$ | $(n, m)$ | Scheme | ACI-ML | ACI-PS | HPD-ML | HPD-PS |
|-----|----------|--------|--------|--------|--------|--------|
| 2   | (50,20)  | 1      | 3.1477 | 3.8090 | 1.8204 | 1.9162 |
|     |          | 2      | 3.2346 | 4.1645 | 1.8572 | 1.9549 |
|     |          | 3      | 3.8325 | 4.8884 | 1.9339 | 2.0357 |
|     | (50,40)  | 1      | 3.0621 | 3.2692 | 1.7810 | 1.8747 |
|     |          | 2      | 3.1278 | 3.3790 | 1.8304 | 1.9267 |
|     |          | 3      | 3.4818 | 3.7924 | 1.8599 | 1.9578 |
|     | (80,32)  | 1      | 2.4672 | 2.8295 | 1.7048 | 1.7945 |
|     |          | 2      | 2.9648 | 3.2509 | 1.7625 | 1.8553 |
|     |          | 3      | 3.1970 | 3.5482 | 1.7682 | 1.8613 |
|     | (80,64)  | 1      | 2.2823 | 2.4824 | 1.0886 | 1.0927 |
|     |          | 2      | 2.7412 | 2.8166 | 1.6568 | 1.7440 |
|     |          | 3      | 2.8115 | 3.1089 | 1.6603 | 1.7477 |
| 3   | (50,20)  | 1      | 3.0208 | 3.0943 | 0.6750 | 0.6895 |
|     |          | 2      | 3.1262 | 3.3984 | 0.6855 | 0.7009 |
|     |          | 3      | 3.7354 | 3.8669 | 0.6984 | 0.7036 |
|     | (50,40)  | 1      | 2.9748 | 2.7082 | 0.6503 | 0.6746 |
|     |          | 2      | 2.9767 | 2.9995 | 0.6514 | 0.6845 |
|     |          | 3      | 3.0943 | 3.7882 | 0.6745 | 0.6995 |
|     | (80,32)  | 1      | 2.4405 | 2.1174 | 0.6375 | 0.6710 |
|     |          | 2      | 2.8536 | 2.6026 | 0.6406 | 0.6743 |
|     |          | 3      | 3.0680 | 3.2895 | 0.6644 | 0.6916 |
|     | (80,64)  | 1      | 2.1532 | 2.0408 | 0.6257 | 0.6586 |
|     |          | 2      | 2.5517 | 2.2772 | 0.6330 | 0.6663 |
|     |          | 3      | 2.6113 | 2.9889 | 0.6570 | 0.6894 |

Table S7: The ACLs of 95% ACI/HPD intervals of  $R(t)$ .

| $T$ | $(n, m)$ | Scheme | ACI-ML | ACI-PS | HPD-ML | HPD-PS |
|-----|----------|--------|--------|--------|--------|--------|
| 2   | (50,20)  | 1      | 0.2439 | 0.2273 | 0.2207 | 0.2154 |
|     |          | 2      | 0.2389 | 0.2197 | 0.2179 | 0.2123 |
|     |          | 3      | 0.2291 | 0.2161 | 0.2122 | 0.2097 |
|     | (50,40)  | 1      | 0.2313 | 0.2145 | 0.2079 | 0.2002 |
|     |          | 2      | 0.2294 | 0.2094 | 0.2038 | 0.1995 |
|     |          | 3      | 0.2254 | 0.2101 | 0.2015 | 0.1948 |
|     | (80,32)  | 1      | 0.2189 | 0.1714 | 0.1535 | 0.1507 |
|     |          | 2      | 0.2154 | 0.1710 | 0.1502 | 0.1459 |
|     |          | 3      | 0.2091 | 0.1606 | 0.1423 | 0.1409 |
|     | (80,64)  | 1      | 0.2052 | 0.1661 | 0.1413 | 0.1386 |
|     |          | 2      | 0.2043 | 0.1614 | 0.1343 | 0.1319 |
|     |          | 3      | 0.2032 | 0.1573 | 0.1358 | 0.1301 |
| 3   | (50,20)  | 1      | 0.2147 | 0.2046 | 0.1984 | 0.1922 |
|     |          | 2      | 0.2112 | 0.1977 | 0.1921 | 0.1893 |
|     |          | 3      | 0.2038 | 0.1929 | 0.1861 | 0.1827 |
|     | (50,40)  | 1      | 0.2107 | 0.1931 | 0.1890 | 0.1879 |
|     |          | 2      | 0.2075 | 0.1895 | 0.1848 | 0.1833 |
|     |          | 3      | 0.1962 | 0.1854 | 0.1837 | 0.1745 |
|     | (80,32)  | 1      | 0.1887 | 0.1706 | 0.1437 | 0.1382 |
|     |          | 2      | 0.1876 | 0.1681 | 0.1365 | 0.1330 |
|     |          | 3      | 0.1840 | 0.1458 | 0.1327 | 0.1298 |
|     | (80,64)  | 1      | 0.1862 | 0.1565 | 0.1367 | 0.1349 |
|     |          | 2      | 0.1841 | 0.1443 | 0.1279 | 0.1252 |
|     |          | 3      | 0.1812 | 0.1383 | 0.1221 | 0.1194 |

Table S8: The ACLs of 95% ACI/HPD intervals of  $h(t)$ .

| $T$ | $(n, m)$ | Scheme | ACI-ML | ACI-PS | HPD-ML | HPD-PS |
|-----|----------|--------|--------|--------|--------|--------|
| 2   | (50,20)  | 1      | 0.2727 | 0.2976 | 0.2397 | 0.2459 |
|     |          | 2      | 0.2835 | 0.3110 | 0.2437 | 0.2546 |
|     |          | 3      | 0.2927 | 0.3215 | 0.2579 | 0.2667 |
|     | (50,40)  | 1      | 0.2538 | 0.2784 | 0.2230 | 0.2174 |
|     |          | 2      | 0.2625 | 0.2881 | 0.2315 | 0.2276 |
|     |          | 3      | 0.2751 | 0.2978 | 0.2358 | 0.2393 |
|     | (80,32)  | 1      | 0.2173 | 0.2386 | 0.1606 | 0.1659 |
|     |          | 2      | 0.2242 | 0.2426 | 0.1682 | 0.1754 |
|     |          | 3      | 0.2476 | 0.2719 | 0.1702 | 0.1890 |
|     | (80,64)  | 1      | 0.1948 | 0.2108 | 0.1495 | 0.1536 |
|     |          | 2      | 0.2034 | 0.2227 | 0.1507 | 0.1671 |
|     |          | 3      | 0.2261 | 0.2467 | 0.1542 | 0.1698 |
| 3   | (50,20)  | 1      | 0.2706 | 0.2857 | 0.2296 | 0.2346 |
|     |          | 2      | 0.2874 | 0.2984 | 0.2363 | 0.2451 |
|     |          | 3      | 0.2905 | 0.3173 | 0.2445 | 0.2501 |
|     | (50,40)  | 1      | 0.2508 | 0.2697 | 0.2119 | 0.2284 |
|     |          | 2      | 0.2615 | 0.2794 | 0.2178 | 0.2315 |
|     |          | 3      | 0.2713 | 0.2861 | 0.2288 | 0.2388 |
|     | (80,32)  | 1      | 0.1902 | 0.2276 | 0.1566 | 0.1579 |
|     |          | 2      | 0.1985 | 0.2321 | 0.1595 | 0.1616 |
|     |          | 3      | 0.2011 | 0.2616 | 0.1670 | 0.1679 |
|     | (80,64)  | 1      | 0.1870 | 0.2049 | 0.1444 | 0.1464 |
|     |          | 2      | 0.1880 | 0.2148 | 0.1481 | 0.1496 |
|     |          | 3      | 0.1933 | 0.2375 | 0.1527 | 0.1551 |

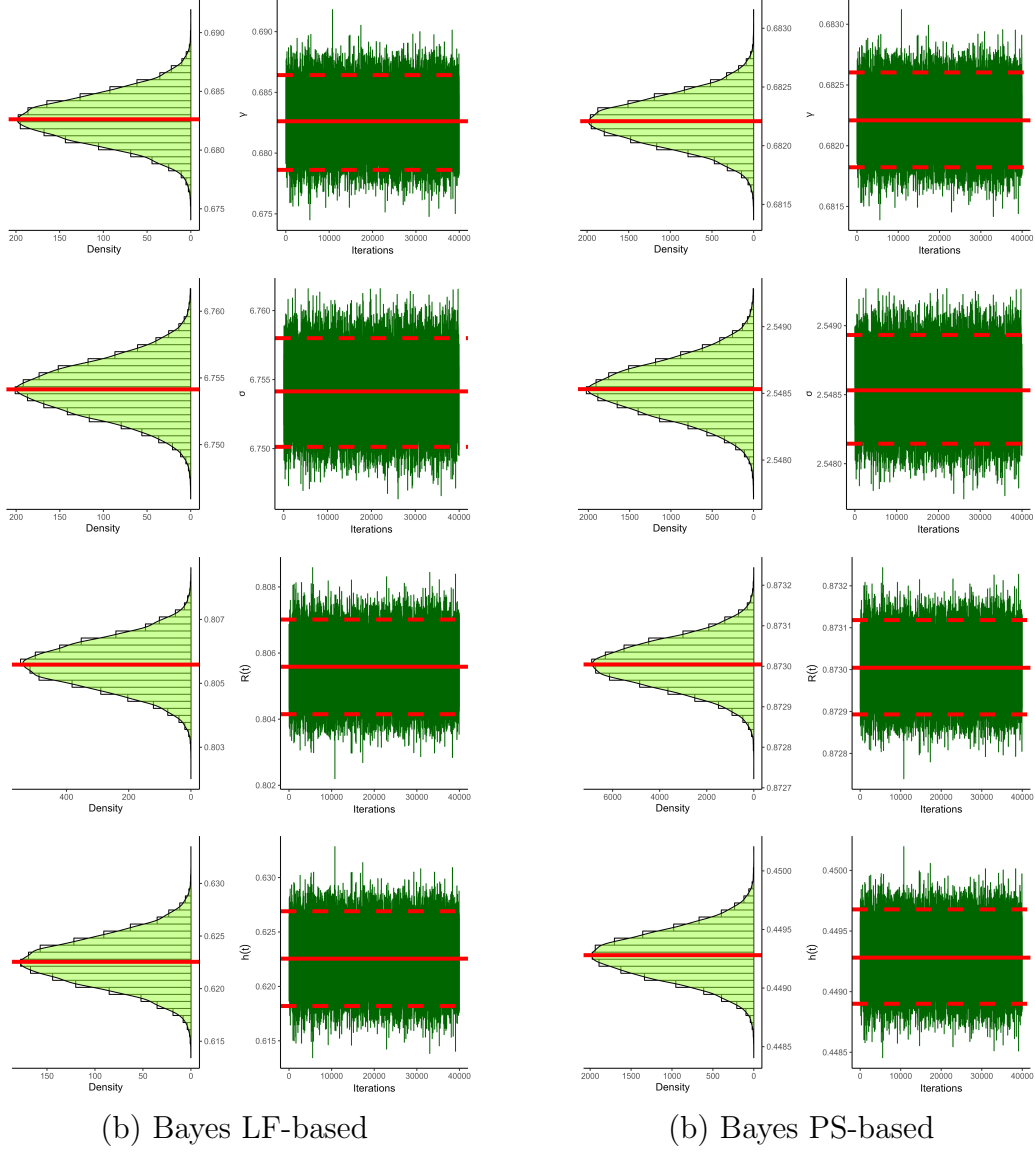

Figure S1: Density (left) and Trace (right) plots of  $\gamma$ ,  $\sigma$ ,  $R(t)$  and  $h(t)$  based on S2 from RME data.

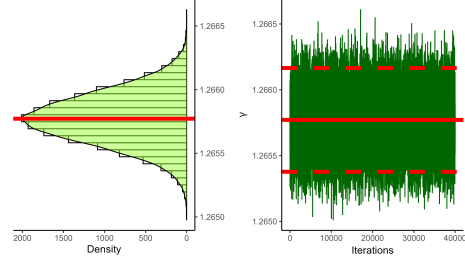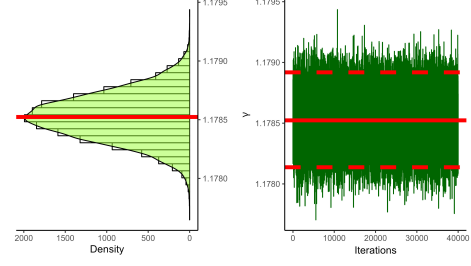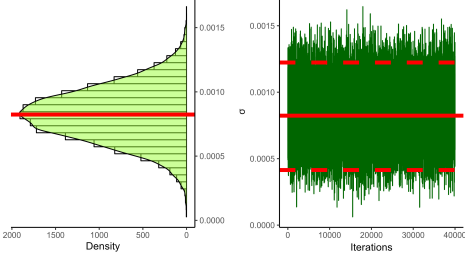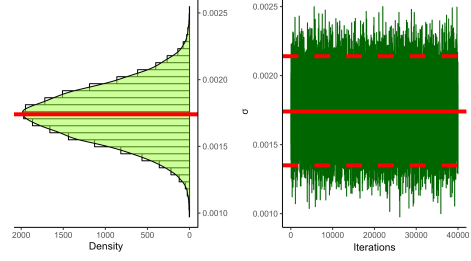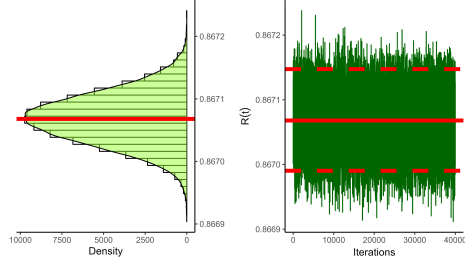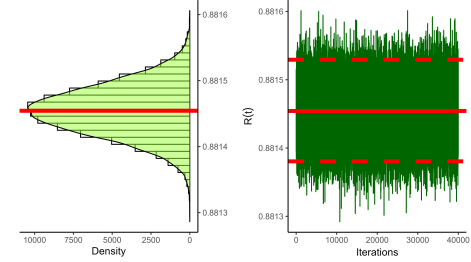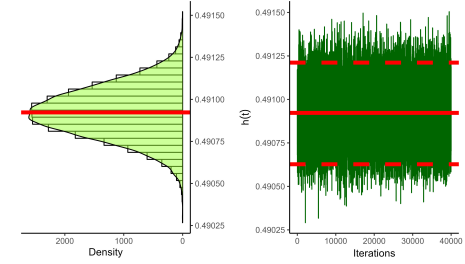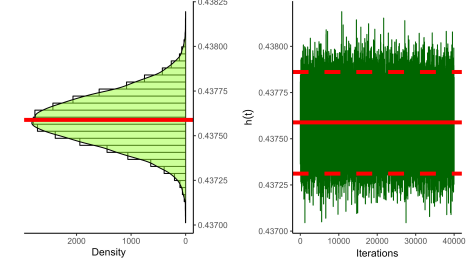

(b) Bayes LF-based

(b) Bayes PS-based

Figure S2: Density (left) and Trace (right) plots of  $\gamma$ ,  $\sigma$ ,  $R(t)$  and  $h(t)$  based on S3 from RME data.
